# Supplementary material
Source: PubMed Central journal article supplement (PMC3969815)
Supplement: NIHMS412346-supplement.pdf [file NIHMS412346-supplement.pdf]

1. Sequences of the primers for the human VMP1 mRNA and the human pri-miR-21 RNA.

VMP1 (Gen Bank Accession Number NM\_030938)

F-Primer (1306-1329) 5'-CAACGGCAGAAGCTTCACCACAAA-3'

R-Primer (1466-1443) 5'-CGCTGCTGGATTTCGTTTGGCATAA-3'

pri-miR-21 (Gen Bank Accession Number AY699265)

F-Primer (2420-2442) 5'-GTGACATCTCCATGGCTGTACCA-3'

R-Primer (2522-2499) 5'-CAAATGTCAGACAGCCCATCGAC-3'

2. Diagram of the overlapping regions between the VMP1 mRNA and the human pri-miR-21 RNA, and the PCR amplicon of the human pri-miR-21 RNA.

>gi|56718410|gb|AY699265.1| Homo sapiens microRNA pri-miR-21, complete sequence

ATAAACCAAGGCTCTTACCATAGCTGAACTTTAAACTTAGACTGTCTTTTCTGTAAACGATTCTGAGGC  
AAAGGGAAATGACTAGAAAGAGGATGAGTAAACAATAACCTGAAATGGGAAACTCGAGGGAAAGCAGAGTT  
TTTTTTGTTTTGTTTTGTTTTGTTTCGTTTTTTGTTCTTTGGGGTTTTTTTTGAGACAGAATTCGCTCTCG  
TTGCCCAAGTTGGAGTGCAATGGCGCGATCTTGGCTCACTGCAACCTCCGCCTCCCGGGTTC AAGCGATT  
CTCCTGCCTCAGCCTCCCAAGTAGCTGTGATTCCAGGCACGTGCCACCACACCAGCTAATTTTTTTGTATT  
TTAATAGAAACAGGGTTTTACCCTGTTAGCCAGGCTGGTCTCAAACCTGACCTCAGATGATCCGCCCGCCT  
TGGCCTCCCAAAGTGCTGGGATTACAGATGTGAGCCACCGCGCCCGCCAGAGCACTGTTTTTTTTAATG  
GCCTTGCACTCTTCTTATGGACCTTTGCTGCCCTCAGTTGACCAAACATGACATCAGAAACAGATACATT  
TGTGTGTTTTTAAAAACAGCTCCTAATACTGGAACAAAAATATTTAACTGTCTTGACAATACTCATGAGTA  
TCTGCATGGCGACTTCAGAGTTGAGTTTAATCAAAGAGTTTATTCTTAGGTCCTAGTAGAAGAGCTAACC  
TCACACTCATCCATTCTAAACTATGTGATTCAACACTGATTTTTACATCCACAAAGTGAAATCTTGATA  
GTTGGGTGTAAAAAGGAGAGTAATGGAGATTTTCAGAGTAGTTGGGGTTGCTTACTTTTTCATTTTTAATTC  
TTTAGGTTTTGTAAAGTTACACACTTCAAGCATTATAGATGATCCTCTTTTTACTACTGAACTAATGAAGC  
CTTTTTCAATTGCATTGTTCTGCATTTATTTCTACAGGGAGAAAACCTGGTTGTCTGGATGTTTGAAAAGT  
TGGTCTGTTGTGATGGTGTGTTACTTCATCCTATCTATCATTAACTCCATGGCACAAAAGTTATGCCAAACG  
AATCCAGCAGCGGTTGAACCTCAGAGGAGAAAACCTAAATAAGTAGAGAAAAGTTTTAACTGCAGAAATTGG  
AGTGGATGGGTTCTGCCTTAAATTGGGAGGACTCCAAGCCGGGAAGGAAAATTCCCTTTTCCAACCTGTA  
TCAATTTTTTACAACTTTTTCTGAAAGCAGTTTAGTCCATACTTTGCACTGACATACTTTTTCTTCTG  
TGCTAAGGTAAGGTATCCACCCTCGATGCAATCCACCTTGTGTTTTCTTAGGGTGGAATGTGATGTTTCAG  
CAGCAAACCTTGCAACAGACTGGCCTTCTGTTTGTACTTTCAAAGGCCACATGATACAATTAGAGAAT  
TCCCACCGCACAAAAAAGTTCCCTAAGTATGTTAAATATGTCAAGCTTTTTTAGGCTTGTACAAAATGATT  
GCTTTGTTTTCTAAGTCATCAAATGTATATAAATTATCTAGATTGGATAACAGTCTTGCATGTTTATC  
ATGTTACAATTTAATATTCATCCTGCCCAACCCTTCTCTCCATCCTCAAAAAAGGGCCATTTTTATGA  
TGCATTGCACACCCTCTGGGGAAATTGATCTTTAAATTTTTGAGACAGTATAAGGAAAATCTGGTTGGTGT  
CTTACAAGTGAGCTGACACCATTTTTTATTCTGTGTATTTAGAATGAAGTCTTGAAAAAACTTTTATAAA  
GACATCTTTAATCATTCCAAAATTGTGTCCGTTTTCTTGAGCGTTTTGATTTTTTACTTTTAGCTTATAC  
CAGCTGAATGGCAGCCTTGCCTAATCCACCTACAACAAGAATTTCTTAAGCTTTCTTTTATTTGCATGAG  
AGAGCCACTACCAAGGCATGTTTTGTTATGTGAAACTGGGCTGCTGCATACTGCTAAATGGCACCTCTG  
GGATTGGCCTACCTGGGGATTTCTTGGTTTTGTGAAAACAGGAGAGGAGAAAATATCTCATACAAGTGAAAG  
GATACTGGAGAGAGAAATTACCATTCTAAAAAAAACCACACTCTGTCTGATCTGTGTTAATGTTTTTC  
TAGCATGTACTCTGGTTTTCAACAGACACAAATTTATATGTTAACCCAGTTTTCTTGCCGTTCTGTAAGTG  
TTTTATTCTTAGTGTGATTTTTTTCCATTGGGATGTTTTTGATTGAACTTGTTCATTTTTGTTTTGCTTGG  
GAGGAAAATAACAATTTTACTTTTTTCTTTTAGGAGCATTATGAGCATTATGTCAGAATAGAATAGAAT  
TGGGGTTCGATCTTAACAGGCCAGAAATGCCTGGGTTTTTTTTGGTTTTGTTTTGTTTTTTTTTAT  
CAAATCCTGCCTGACTGTCTGCTTGTGTTTTGCCTACCATCGTGACATCTCCATGGCTGTACCACCTTGTCTG  
GGTAGCTTATCAGACTGATGTTGACTGTTGAATCTCATGGCAACACCAGTCGATGGGCTGTCTGACATTT

TGGTATCTTTTCATCTGACCATCCATATCCAATGTTCTCATTAAACATTACCCAGCATCATTGTTTATAA  
TCAGAAACTCTGGTCCTTCTGTCTGGTGGCACTTAGAGTCTTTTGTGCCATAATGCAGCAGTATGGAGGG  
AGGATTTTATGGAGAAATGGGGATAGTCTTCATGACCACAAATAAATAAAGGAAAACCTAAGCTGCATTGT  
GGGTTTTGAAAAGGTTATTATACTTCTTAACAATTCTTTTTTTTCAGGGACTTTTCTAGCTGTATGACTGT  
TACTTGACCTTCTTTGAAAAGCATTCCCAAAATGCTCTATTTTAGATAGATTAACATTAACCAACATAAT  
TTTTTTTAGATCGAGTCAGCATAAATTTCTAAGTCAGCCTCTAGTCGTGGTTCATCTCTTTTCACCTGCAT  
TTTATTTGGTGTGTGTCTGAAGAAAGGAAAGAGGAAAGCAAATACGAATTGTACTATTTGTACCAAATCT  
TTGGGATTCATTGGCAAATAATTTTCAGTGTGGTGTATTATTAATAGAAAAAAAAAATTTGTTTCCTAGG  
TTGAAGGTCTAATTGATACGTTTGACTTATGATGACCATTTATGCACTTTCAAATGAATTTGCTTTCAA  
ATAAATGAAGAGCAGCTGTCCTTCTTCTCTTTAAGTGTTTCAGCTGTGGCATGCTCAGAGGTTCTCTGC  
TGGATTCCAGCTGGAGCGGTGTGATACCCTTCTTTTTTCAGCTGTTTCGTGCCTTCTTTCTTGTGTCCACC  
AAAGTGGAGACAAATACATGATCTCAAAGATACACAGTACCTACTTAATTCCAGCTGATGGGAGACAAA  
GAATTTGCAAGTGGATGGTTTGGTATCACTGTAAATAAAAAGAGGGCCTGGGAATTCCTTGCGATTCCATC  
TCTAAAAAAAAAAAAAAAAAAAAAAAAAAAAAAAAA

The dark brown sequences indicate the amplicon of pri-miR-21. The dark blue sequences indicate the last exon of VMP1 mRNA (NM\_030938), 1347-2172, which resides in the pri-miR-21 RNA (AY699265). The reverse primer for VMP1 is underlined. The forward primer is located upstream of the pri-miR-21 sequences in the second to the last exon, and separated from pri-miR-21 by the last intron of VMP1.
